# Supplementary material
Source: MDPI journal article supplement (https://www.mdpi.com/2076-3417/13/22/12233)
Supplement: s1 [file s1]

**Table S1.** Content of individual phenolic compounds present in *Brunfelsia grandiflora*. Results represent the mean  $\pm$  standard deviation ( $n = 4$ ). N.D.: not detected; d.w.: dry weight.

| RT (min)                                           | Proposed Compound                                       | <i>Brunfelsia grandiflora</i> (mg/100 g d.w.)  |
|----------------------------------------------------|---------------------------------------------------------|------------------------------------------------|
| <b>HYDROXYCINNAMIC ACIDS and HYDROXYCINNAMATES</b> |                                                         |                                                |
| 4.7                                                | 5-Chlorogenic acid                                      | 3.13 $\pm$ 0.18                                |
| 5.0                                                | Caffeoylquinic acid                                     | 1.89 $\pm$ 0.07                                |
| 5.1                                                | Caffeoylquinic acid                                     | 0.70 $\pm$ 0.05                                |
| 5.9                                                | Caffeic acid                                            | 0.21 $\pm$ 0.01                                |
| 8.0                                                | <i>p</i> -Coumaric acid                                 | 0.10 $\pm$ 0.01                                |
| 9.0                                                | Ferulic acid                                            | 3.99 $\pm$ 0.10                                |
| 9.4                                                | Sinapic acid                                            | 0.31 $\pm$ 0.02                                |
| 10.2                                               | Dehydrodiferulic acid                                   | 7.62 $\pm$ 0.11                                |
| 11.3                                               | Caffeic acid- <i>O</i> -glucoside                       | 533.86 $\pm$ 8.29                              |
| 12.5                                               | Coumaric acid- <i>O</i> -glucoside                      | 57.57 $\pm$ 0.50                               |
| 12.8                                               | Coumaroylquinic acid                                    | 2.26 $\pm$ 0.10                                |
| 13.0                                               | Ferulic acid- <i>O</i> -glucoside                       | 391.46 $\pm$ 17.08                             |
| 13.1                                               | Sinapic acid- <i>O</i> -glucoside                       | 81.55 $\pm$ 1.66                               |
| 13.4                                               | Ferulic acid- <i>O</i> -glucoside                       | 19.33 $\pm$ 1.00                               |
| 13.4                                               | Feruloylquinic acid                                     | 151.04 $\pm$ 4.07                              |
| 13.5                                               | Sinapoylquinic acid                                     | 6.54 $\pm$ 0.09                                |
| 13.7                                               | Feruloylquinic acid                                     | 7.51 $\pm$ 0.22                                |
| 13.8                                               | Ferulic acid- <i>O</i> -glucoside                       | 64.22 $\pm$ 2.11                               |
| 15.2                                               | Sinapic acid- <i>O</i> -glucoside                       | 8.76 $\pm$ 0.30                                |
| 15.6                                               | Coumaric acid- <i>O</i> -glucoside                      | 1.61 $\pm$ 0.14                                |
| 17.4                                               | Coumaric acid- <i>O</i> -glucoside                      | 1.48 $\pm$ 0.04                                |
|                                                    | <b>TOTAL HYDROXYCINNAMIC ACIDS (mg/100 g) (%)</b>       | <b>1345.13 <math>\pm</math> 36.16 (66.77%)</b> |
| <b>HYDROXYCOUMARINS</b>                            |                                                         |                                                |
| 3.7                                                | Esculin                                                 | 4.71 $\pm$ 1.16                                |
| 5.7                                                | Esculetin                                               | 21.49 $\pm$ 0.66                               |
| 8.9                                                | Scopoletin                                              | 286.77 $\pm$ 21.28                             |
|                                                    | <b>TOTAL HYDROXYCOUMARINS (mg/100 g) (%)</b>            | <b>312.97 <math>\pm</math> 23.11 (15.13%)</b>  |
| <b>LIGNANS</b>                                     |                                                         |                                                |
| 8.8                                                | Pinoresinol                                             | 0.77 $\pm$ 0.03                                |
| 9.5                                                | Matairesinol                                            | 2.45 $\pm$ 0.29                                |
| 9.6                                                | Hydroxysecoisolariciresinol isomer                      | 5.19 $\pm$ 0.19                                |
| 9.8                                                | Secoisolariciresinol isomer                             | 3.35 $\pm$ 0.20                                |
| 9.9                                                | Hydroxysecoisolariciresinol isomer                      | 4.43 $\pm$ 0.10                                |
| 11.3                                               | Sesamol                                                 | 55.36 $\pm$ 2.46                               |
| 11.8                                               | Secoisolariciresinol                                    | 2.42 $\pm$ 0.09                                |
| 12.7                                               | Cyclolariciresinol or Isolariciresinol                  | 9.70 $\pm$ 0.57                                |
| 12.9                                               | Hydroxymatairesinol/ Nortrachelogenin                   | 15.23 $\pm$ 0.75                               |
| 13.4                                               | Sesamin                                                 | 16.00 $\pm$ 0.47                               |
| 15.2                                               | Secoisolariciresinol isomer                             | 2.95 $\pm$ 0.20                                |
| 19.4                                               | Episesamin                                              | 5.51 $\pm$ 0.13                                |
|                                                    | <b>TOTAL LIGNANS (mg/100 g) (%)</b>                     | <b>123.36 <math>\pm</math> 5.48 (6.12%)</b>    |
| <b>FLAVONOLS</b>                                   |                                                         |                                                |
| 4.9                                                | Kaempferol- <i>O</i> -rutinoside                        | 3.97 $\pm$ 2.21                                |
| 10.6                                               | Isorhamnetin- <i>O</i> -rutinoside                      | 8.09 $\pm$ 0.09                                |
| 12.0                                               | Kaempferol- <i>O</i> -galactoside- <i>O</i> -rhamnoside | 7.62 $\pm$ 0.29                                |
| 12.2                                               | Isorhamnetin- <i>O</i> -glucoside- <i>O</i> -rhamnoside | 94.51 $\pm$ 2.47                               |
|                                                    | <b>TOTAL FLAVONOLS (mg/100 g) (%)</b>                   | <b>114.18 <math>\pm</math> 5.06 (5.67%)</b>    |
| <b>PHENOLIC ACIDS</b>                              |                                                         |                                                |
| 2.3                                                | Methoxy-hydroxybenzoic acid glucoside                   | 2.86 $\pm$ 0.22                                |
| 2.4                                                | Dihydroxybenzoic acid glucose                           | 2.16 $\pm$ 0.10                                |
| 2.6                                                | Dihydroxybenzoic acid glucose                           | 2.80 $\pm$ 0.20                                |
| 3.2                                                | 3,4-Dihydroxybenzoic acid (protocatechuic acid)         | 5.23 $\pm$ 0.25                                |
| 4.8                                                | 3-Hydroxybenzoic acid                                   | 6.97 $\pm$ 0.15                                |
| 4.9                                                | 3-Hydroxyphenylpropionic acid                           | 3.99 $\pm$ 0.24                                |
| 5.1                                                | Dihydroxybenzoic acid                                   | 1.03 $\pm$ 0.04                                |

| RT (min)          | Proposed Compound                                        | <i>Brunfelsia grandiflora</i> (mg/100 g d.w.) |
|-------------------|----------------------------------------------------------|-----------------------------------------------|
| 5.4               | 3,4-Dihydroxyphenylpropionic acid                        | 3.81 ± 0.15                                   |
| 5.9               | 3-Methoxy-4-hydroxybenzoic acid (vanillic acid)          | 2.73 ± 0.16                                   |
| 6.1               | 4-Hydroxybenzoic acid                                    | 1.50 ± 0.02                                   |
| 6.4               | Dihydroxybenzoic acid                                    | 1.22 ± 0.06                                   |
| 6.4               | 3-Methoxy-4-hydroxyphenylacetic acid (Homovanillic acid) | 0.17 ± 0.01                                   |
| 6.5               | 4-Hydroxyphenylacetic acid                               | 7.61 ± 0.09                                   |
| 6.7               | Dihydroxybenzoic acid                                    | 0.59 ± 0.06                                   |
| 6.8               | Methoxy-hydroxybenzoic acid                              | 2.11 ± 0.06                                   |
| 8.0               | Hydroxyphenylacetic acid                                 | 3.98 ± 0.07                                   |
| 8.1               | Dihydroxybenzoic acid glucose                            | 0.81 ± 0.02                                   |
| 8.4               | 3-Methoxy-4-hydroxyphenylpropionic acid                  | 1.08 ± 0.05                                   |
| 8.7               | 4-Hydroxyphenylpropionic acid                            | 2.73 ± 0.10                                   |
| 9.8               | Methoxy-hydroxyphenylpropionic acid                      | 1.85 ± 0.07                                   |
| 11.3              | Methoxy-hydroxybenzoic acid                              | 7.23 ± 0.24                                   |
|                   | TOTAL PHENOLIC ACIDS (mg/100 g) (%)                      | 62.46 ± 2.38 (3.10%)                          |
| <b>GALLATES</b>   |                                                          |                                               |
| 2.0               | Gallic acid                                              | 0.97 ± 0.13                                   |
| 3.6               | Methyl-gallate                                           | 0.66 ± 0.06                                   |
| 5.0               | Galloyl-glucose                                          | 1.82 ± 0.13                                   |
| 6.3               | Ethyl-gallate                                            | 3.99 ± 0.09                                   |
| 6.6               | Methyl-gallate                                           | 2.89 ± 0.10                                   |
| 7.2               | Ethyl-gallate                                            | 12.38 ± 0.38                                  |
| 9.4               | Methyl-gallate                                           | 0.57 ± 0.06                                   |
| 11.4              | Ethyl-gallate                                            | 19.92 ± 0.56                                  |
| 13.0              | Ethyl-gallate                                            | 3.28 ± 0.10                                   |
|                   | TOTAL GALLATES (mg/100 g) (%)                            | 46.48 ± 1.62 (2.31%)                          |
| <b>FLAVANOLS</b>  |                                                          |                                               |
| 6.1               | Gallocatechin                                            | 5.54 ± 0.12                                   |
| 14.2              | Methyl-epigallocatechin                                  | 0.29 ± 0.02                                   |
|                   | TOTAL FLAVANOLS (mg/100 g) (%)                           | 5.83 ± 0.14 (0.29%)                           |
| <b>FLAVANONES</b> |                                                          |                                               |
| 10.2              | Eriodictyol                                              | 0.54 ± 0.05                                   |
| 12.1              | Naringenin-O-glucoside                                   | 1.59 ± 0.06                                   |
| 12.3              | Eriodictyol-O-glucoside                                  | 0.65 ± 0.02                                   |
| 15.9              | Naringenin                                               | 0.06 ± 0.01                                   |
| 16.2              | Eriodictyol-O-glucoside                                  | 1.00 ± 0.07                                   |
| 16.9              | Hesperetin                                               | 0.09 ± 0.01                                   |
| 18.0              | Naringenin-O-glucoside                                   | 0.37 ± 0.05                                   |
|                   | TOTAL FLAVANONES (mg/100 g) (%)                          | 4.30 ± 0.27 (0.21%)                           |
|                   | <b>TOTAL PHENOLIC COMPOUNDS</b>                          | <b>2014.71 ± 74.23 (100%)</b>                 |

## **MATERIAL AND METHODS**

**Table S2.** Parte of 2.9. Molecular assay by Real-Time PCR. Forward and reverse sequences for genes related to cell death, the inflammasome complex and antioxidant biomarkers:

|                                                                 |                                                    |
|-----------------------------------------------------------------|----------------------------------------------------|
| <i>BAX</i> ( <i>Bcl-2-associated X protein</i> )                | 'CCCCGAGAGGTCTTTTCC' 'CCTTGAGCACCAGTTTGCTG'        |
| <i>APAF1</i> ( <i>Apoptotic protease-activating factor 1</i> )  | 'TCTTCCAGTGGTAAAGATTCAGT' 'CGGAGACGGTCTTTAGC       |
| <i>BNIP3</i> ( <i>BCL2-interacting protein 3</i> )              | 'CCTCAGCATGAGGAACACGA' 'GCCACCCCAGGATCTAACAG       |
| <i>NFκB</i> ( <i>Nuclear factor kappa B</i> )                   | 'TTTTCGACTACGCGGTGACA'<br>'GTTACCCAAGCGGTCCAGAA'   |
| <i>NRF2</i> ( <i>Nuclear factor erythroid related factor2</i> ) | 'CTGGTCATCGGAAAACCCCA' 'TCTGCAATTCTGAGCAGCCA       |
| <i>SOD</i> ( <i>Superoxide dismutase</i> )                      | 'CCACTGCTGGGGATTGATGT'<br>'CGTGGTTTACTTTTTGCAAGCC' |

## **RESULTS**

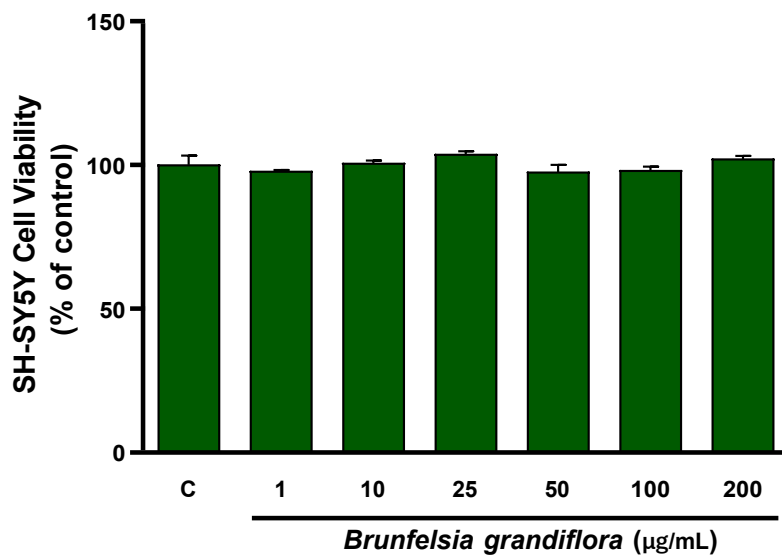

**Figure S1.** Effect of *B. grandiflora* extract on SH-SY5Y cell viability. There are no statistical differences between the groups analyzed.

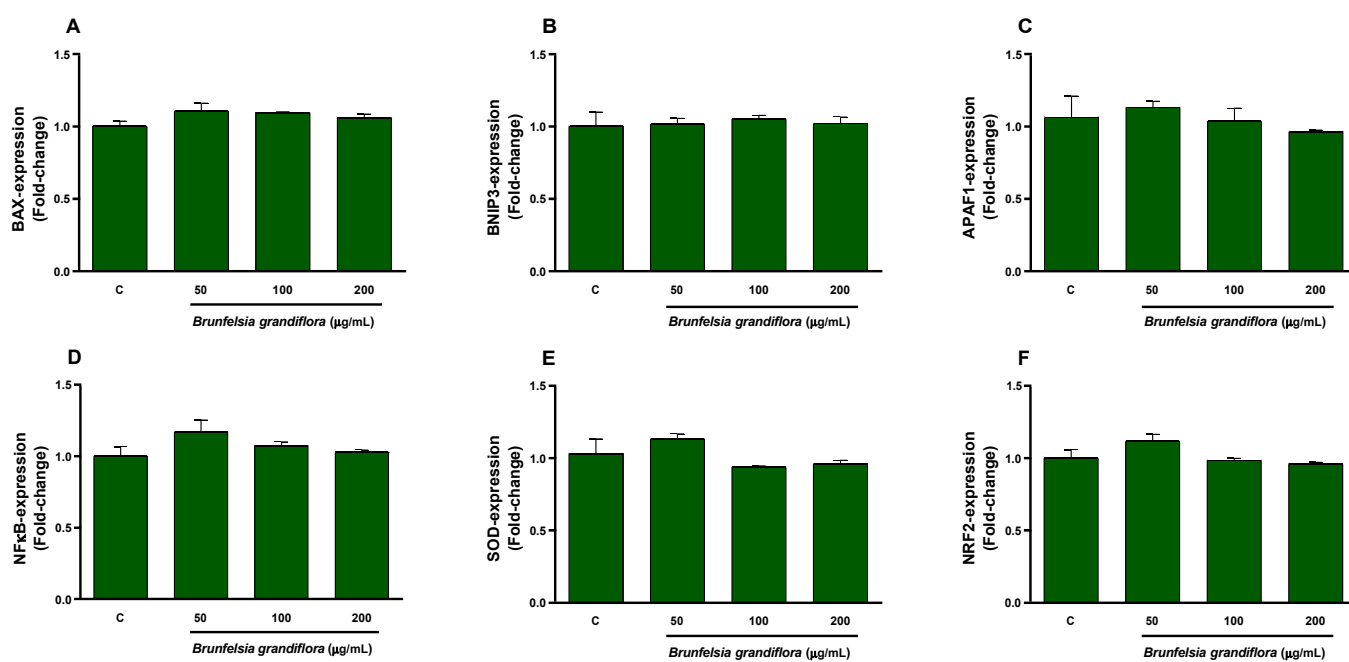

**Figure S2.** Part of Figure 4 and 5. Effect of *B. grandiflora* extract on molecular expression of cell death and oxidative stress biomarkers in SH-SY5Y cells. There are no statistical differences between the groups analyzed.
